# Supplementary material
Source: Research Square preprint supplement (doi:10.21203/rs.3.rs-10259383/v1)
Supplement: Supplementary file 1 [file 46488f5651cd9955aeb7f67a.docx]

# **APPENDIX A - ILLUSTRATIVE COMPLIANCE RECIPE**

The following abbreviated recipe shows the declarative form by which a regime is specified. A complete file adds further rules and per-agent overrides.

name: nda_review
retrieval: { hybrid_ratio: 0.55, top_k: 10, rerank: true }
scoring: { pass_threshold: 80, warn_threshold: 60,
 weights: { high: 15, medium: 7, low: 2 } }
rules:
 - id: NDA-001
 type: must_contain
 severity: high
 title: Confidentiality clause present
 keywords: [confidential information, non-disclosure]
 - id: NDA-002
 type: regex
 severity: medium
 title: Governing law stated
 pattern: governing law
